# Supplementary material for: PaPI: pseudo amino acid composition to score human protein-coding variants
Source: PubMed Central journal article supplement (PMC4411653; doi:10.1186/s12859-015-0554-8), 2015-04-19
Supplement: 12859_2015_554_MOESM1_ESM.pdf [file 12859_2015_554_MOESM1_ESM.pdf]

## Additional file 1

### Supplementary Tables

| Tool                   | Test Set | AUC  | Balanced accuracy | F-m  | MCC  |
|------------------------|----------|------|-------------------|------|------|
| RF –<br>PseAAC<br>only | # 1      | .885 | .816              | .816 | .628 |
|                        | # 2      | .888 | .821              | .821 | .637 |
|                        | # 3      | .892 | .827              | .827 | .65  |

**Table S1.** Performances of the RF trained only using PseAAC features, measured on the three unfiltered test sets. Area under the curve (AUC), balanced accuracy (sensitivity/2 + specificity/2), F-measure (F-m) and Matthews correlation coefficient (MCC) are shown.

| Set | Damaging | Tolerated | All   |
|-----|----------|-----------|-------|
| # 1 | 5316     | 5153      | 10469 |
| # 2 | 5323     | 5153      | 10476 |
| # 3 | 3763     | 3642      | 7405  |

**Table S2.** The three filtered variant set used to measure performances of RF, PolyPhen2, SIFT and PaPI. Test sets have been divided by Tolerated and Damaging set. Variants on multiple transcripts have been counted once.

### Supplementary Figures

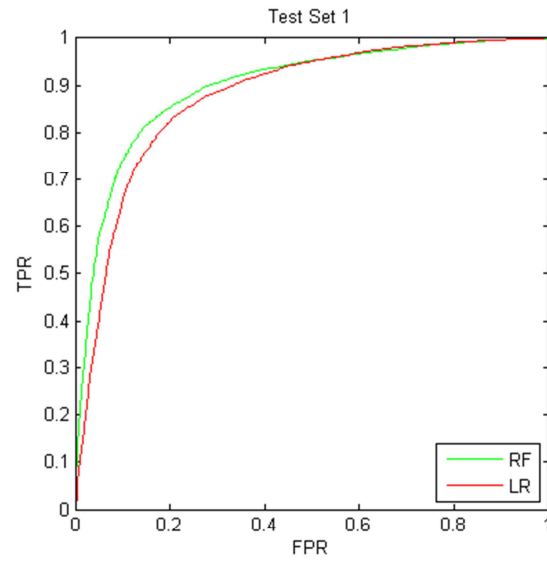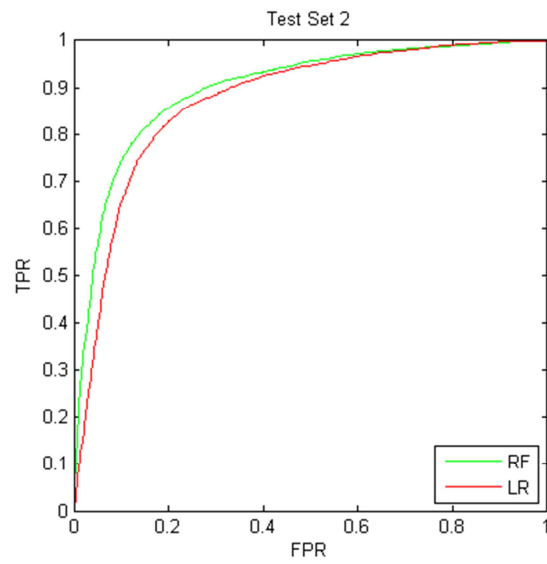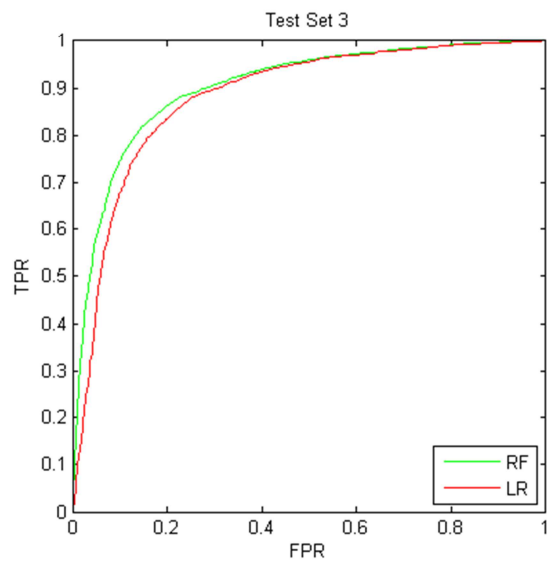

**Figure S1.** ROC curves of Logistic Regression (LR) and Random Forest (RF) on the three unfiltered variant test sets.

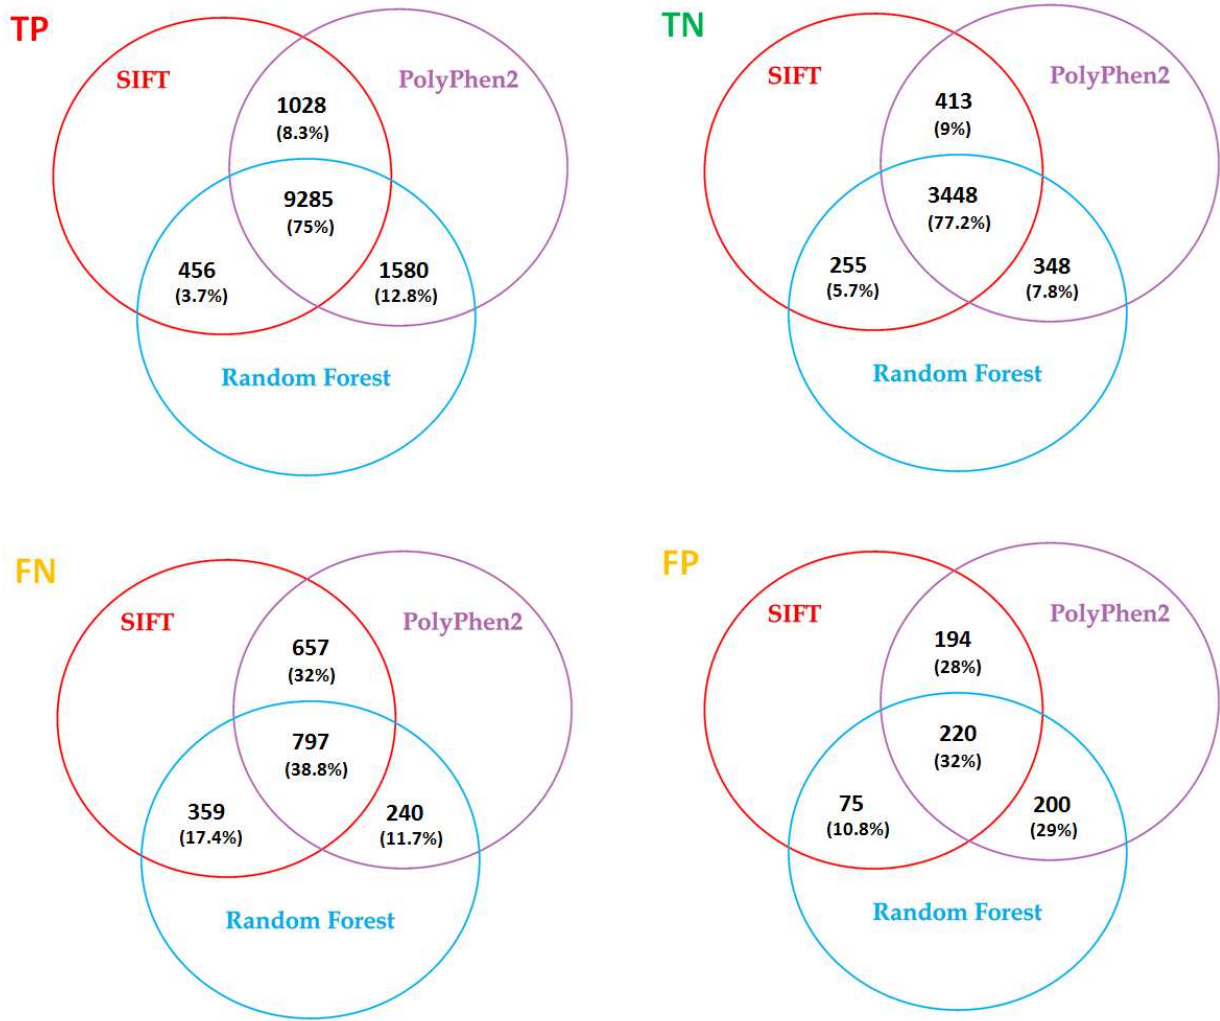

**Figure S2.** Venn diagrams showing contingencies in terms of prediction agreement between the Random Forest, SIFT and PolyPhen2 on the whole variant test set where both PolyPhen2 and SIFT hold a prediction. P=Positive (Damaging), N=Negative (Tolerated).

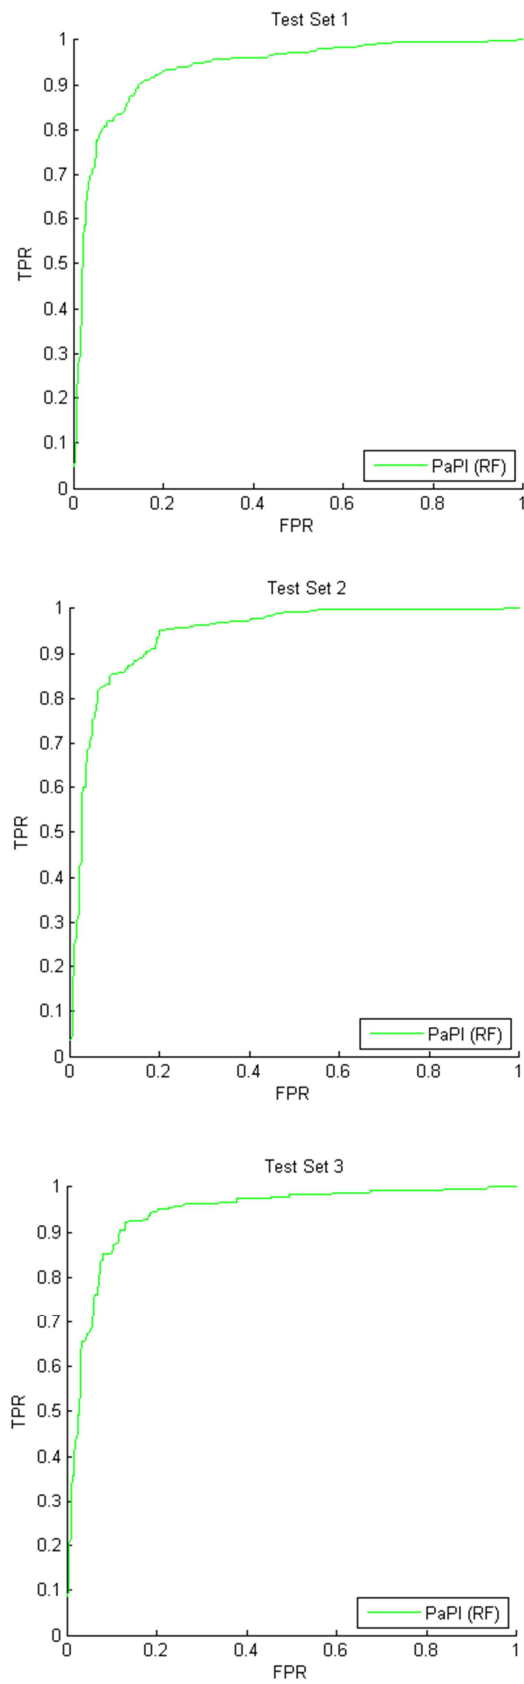

**Figure S3.** ROC curves of PaPI on the three variant test sets after retaining those variants unpredictable for both PolyPhen2 and SIFT. For these cases PaPI coincides with RF.
